# Supplementary material for: Different Chemotherapy Regimens and Pathologic Complete Response in Triple-Negative Breast Cancer: An Updated Network Meta-Analysis of Phase 3 Trials
Source: MDPI journal article supplement (doi:10.3390/medicina60020341), 2024-02-19
Supplement: s1 [file s1]

**Supplementary Table S1.** Comparison of the included interventions: risk ratio (95% CrI). Each cell gives the effect of the column-defining intervention relative to the row-defining intervention. Risk ratio > 1 means better pCR rates for treatments in the columns compared to treatments in the rows, and < 1 means worst pCR rates for ~~treatments~~treatments in the columns compared to treatments in the rows. Grey ~~colour~~color represent the direct comparisons. Bold character highlights the significant differences.

|               |                   |                          |                          |                          |                          |                          |                          |                          |
|---------------|-------------------|--------------------------|--------------------------|--------------------------|--------------------------|--------------------------|--------------------------|--------------------------|
| AT-CAPE-based | 1.46 (0.83, 2.60) | <b>1.41 (1.04, 2.02)</b> | <b>1.80 (1.29, 2.61)</b> | <b>3.23 (2.20, 4.89)</b> | <b>2.18 (1.51, 3.28)</b> | <b>2.39 (1.63, 3.66)</b> | <b>2.60 (1.79, 3.96)</b> | <b>2.44 (1.54, 3.93)</b> |
|               | AT-GEM-based      | 0.97 (0.61, 1.54)        | 1.23 (0.75, 2.00)        | <b>2.22 (1.30, 3.70)</b> | 1.49 (0.90, 2.47)        | 1.63 (0.97, 2.74)        | 1.78 (1.06, 2.99)        | 1.66 (0.94, 2.94)        |
|               |                   | AT-based                 | <b>1.26 (1.10, 1.46)</b> | <b>2.27 (1.81, 2.86)</b> | <b>1.53 (1.25, 1.88)</b> | <b>1.67 (1.33, 2.13)</b> | <b>1.83 (1.47, 2.30)</b> | <b>1.71 (1.22, 2.39)</b> |
|               |                   |                          | Bev-AT-based             | <b>1.79 (1.37, 2.34)</b> | 1.20 (0.94, 1.54)        | <b>1.32 (1.01, 1.74)</b> | <b>1.44 (1.11, 1.88)</b> | 1.35 (0.94, 1.93)        |
|               |                   |                          |                          | Immuno-AT-based          | <b>0.67 (0.55, 0.81)</b> | <b>0.73 (0.59, 0.92)</b> | <b>0.80 (0.69, 0.92)</b> | 0.75 (0.57, 1.00)        |
|               |                   |                          |                          |                          | NabP-AT-based            | 1.09 (0.85, 1.41)        | 1.19 (0.96, 1.49)        | 1.11 (0.80, 1.54)        |
|               |                   |                          |                          |                          |                          | PARPi-Platinum-AT-based  | 1.09 (0.90, 1.30)        | 1.02 (0.74, 1.38)        |
|               |                   |                          |                          |                          |                          |                          | Platinum-AT-based        | 0.93 (0.73, 1.19)        |
|               |                   |                          |                          |                          |                          |                          |                          | <b>ddAT-based</b>        |

AT-based, anthracyclines/taxanes chemotherapy; ddAT, dose dense-anthracyclines/taxanes chemotherapy; AT-CAPE, anthracyclines/taxanes + capecitabine chemotherapy; AT-GEM, anthracyclines/taxanes + gemcitabine chemotherapy; Bev-AT, anthracyclines/taxanes + bevacizumab chemotherapy; Immuno-AT, anthracyclines/taxanes + immunotherapy-based chemotherapy; Nab-P-AT, anthracyclines + nab-Paclitaxel chemotherapy; PARPi-Platinum-AT, anthracyclines/taxanes + platinum agents + PARP inhibitors-based chemotherapy; Platinum-AT, anthracyclines/taxanes + platinum agents chemotherapy.

**Supplementary Table S2.** Rank probabilities table (the rank probability of the 9 regimens for pCR. Rank 1 represents the best treatment and rank 9 represents the worst.

|                         | Rank 1 | Rank 2 | Rank 3 | Rank 4 | Rank 5 | Rank 6 | Rank 7 | Rank 8 | Rank 9 |
|-------------------------|--------|--------|--------|--------|--------|--------|--------|--------|--------|
| AT-CAPE-based           | 0      | 0      | 0      | 0      | 0      | 0      | 0      | 0.09   | 0.90   |
| AT-GEM-based            | 0      | 0.01   | 0      | 0.01   | 0.03   | 0.13   | 0.33   | 0.36   | 0.09   |
| AT-based                | 0      | 0      | 0      | 0      | 0      | 0      | 0.45   | 0.54   | 0      |
| Bev-AT-based            | 0      | 0      | 0      | 0.01   | 0.08   | 0.71   | 0.18   | 0      | 0      |
| Immuno-AT-based         | 0.97   | 0.02   | 0      | 0      | 0      | 0      | 0      | 0      | 0      |
| NabP-AT-based           | 0      | 0.03   | 0.08   | 0.24   | 0.54   | 0.08   | 0      | 0      | 0      |
| PARPi-Platinum-AT-based | 0      | 0.13   | 0.26   | 0.40   | 0.16   | 0.02   | 0      | 0      | 0      |
| Platinum-AT-based       | 0      | 0.54   | 0.38   | 0.06   | 0      | 0      | 0      | 0      | 0      |
| ddAT-based              | 0.02   | 0.24   | 0.25   | 0.25   | 0.16   | 0.04   | 0      | 0      | 0      |

AT-based, anthracyclines/taxanes chemotherapy; ddAT, dose dense-anthracyclines/taxanes chemotherapy; AT-CAPE, anthracyclines/taxanes + capecitabine chemotherapy; AT-GEM, anthracyclines/taxanes + gemcitabine chemotherapy; Bev-AT, anthracyclines/taxanes + bevacizumab chemotherapy; Immuno-AT, anthracyclines/taxanes + immunotherapy-based chemotherapy; Nab-P-AT, anthracyclines + nab-Paclitaxel chemotherapy; PARPi-Platinum-AT,

anthracyclines/taxanes + platinum agents + PARP inhibitors-based chemotherapy;  
Platinum-AT, anthracyclines/taxanes + platinum agents chemotherapy.
